# Supplementary material for: Preventive Effect of Limosilactobacillus fermentum SCHY34 on Lead Acetate-Induced Neurological Damage in SD Rats
Source: Front Nutr. 2022 Apr 27;9:852012. doi: 10.3389/fnut.2022.852012 (PMC9094495; doi:10.3389/fnut.2022.852012)
Supplement: Supplementary file 1 [file Data_Sheet_1.ZIP]

Archive with 95 entries (83 files):
- SCHY34-raw data/
- SCHY34-raw data/figure 1.png
- SCHY34-raw data/table 8.xlsx
- SCHY34-raw data/table 7.xlsx
- SCHY34-raw data/table 6.xlsx
- SCHY34-raw data/table 5.xlsx
- SCHY34-raw data/table 4.xlsx
- SCHY34-raw data/table 3.xlsx
- SCHY34-raw data/table 2.xlsx
- SCHY34-raw data/figure 10.png
- SCHY34-raw data/in vitro experiments.xlsx
- SCHY34-raw data/figure 9/p-CREB.jpg
- SCHY34-raw data/figure 9/c-jun.jpg
- SCHY34-raw data/figure 9/c-FOS.jpg
- SCHY34-raw data/figure 9/beta-actin.jpg
- SCHY34-raw data/figure 9/SYN.jpg
- SCHY34-raw data/figure 9/SOD2.jpg
- SCHY34-raw data/figure 9/SOD1.jpg
- SCHY34-raw data/figure 9/PKA.jpg
- SCHY34-raw data/figure 9/Nrf2.jpg
- SCHY34-raw data/figure 9/NOS1.jpg
- SCHY34-raw data/figure 9/NMDAR2.jpg
- SCHY34-raw data/figure 9/NMDAR1.jpg
- SCHY34-raw data/figure 2/
- SCHY34-raw data/figure 2/a.tif
- SCHY34-raw data/figure 2/b.tif
- SCHY34-raw data/figure 2/c.tif
- SCHY34-raw data/figure 2/d.tif
- SCHY34-raw data/figure 3/
- SCHY34-raw data/figure 3/a.jpg
- SCHY34-raw data/figure 3/b.jpg
- SCHY34-raw data/figure 3/c.jpg
- SCHY34-raw data/figure 3/d.jpg
- SCHY34-raw data/figure 4/
- SCHY34-raw data/figure 4/EDTA.bmp
- SCHY34-raw data/figure 4/LF-SCHY34.bmp
- SCHY34-raw data/figure 4/lead-induced.bmp
- SCHY34-raw data/figure 4/normal.bmp
- SCHY34-raw data/figure 5/
- SCHY34-raw data/figure 5/EDTA.jpg
- SCHY34-raw data/figure 5/LF-SCHY34.jpg
- SCHY34-raw data/figure 5/Normal.jpg
- SCHY34-raw data/figure 5/lead-induced.jpg
- SCHY34-raw data/figure 6/
- SCHY34-raw data/figure 6/EDTA.jpg
- SCHY34-raw data/figure 6/LF-SCHY34.jpg
- SCHY34-raw data/figure 6/Lead-induced.jpg
- SCHY34-raw data/figure 6/Normal.jpg
- SCHY34-raw data/figure 7/
- SCHY34-raw data/figure 7/CA1-EDTA║ú┬φ15-8.jpg
- SCHY34-raw data/figure 7/CA1-LF-SCHY34║ú┬φ6-6.jpg
- SCHY34-raw data/figure 7/CA1-Lead-induced║ú┬φ12-3.jpg
- SCHY34-raw data/figure 7/CA1-Normal║ú┬φ1-5.jpg
- SCHY34-raw data/figure 7/CA3-EDTA.jpg
- SCHY34-raw data/figure 7/CA3-LF-SCHY34.jpg
- SCHY34-raw data/figure 7/CA3-Lead-induced.jpg
- SCHY34-raw data/figure 7/CA3-Normal.jpg
- SCHY34-raw data/figure 7/DG-EDTA.jpg
- SCHY34-raw data/figure 7/DG-LF-SCHY34.jpg
- SCHY34-raw data/figure 7/DG-Lead-induced.jpg
- SCHY34-raw data/figure 7/DG-Normal.jpg
- SCHY34-raw data/figure 8/
- SCHY34-raw data/figure 8/EDTA.jpg
- SCHY34-raw data/figure 8/LF-SCHY34.jpg
- SCHY34-raw data/figure 8/Lead-induced.jpg
- SCHY34-raw data/figure 8/Normal.jpg
- SCHY34-raw data/figure 9/
- SCHY34-raw data/figure 9/BDNF.jpg
- SCHY34-raw data/figure 9/Bax.jpg
- SCHY34-raw data/figure 9/Bcl-2.jpg
- SCHY34-raw data/figure 9/CAM.jpg
- SCHY34-raw data/figure 9/Caspase-3.jpg
- SCHY34-raw data/figure 9/GSH.jpg
- SCHY34-raw data/figure 9/HO_1.jpg
- SCHY34-raw data/table 9.xlsx
- SCHY34-raw data/figure 10/
- SCHY34-raw data/figure 10/BDNF.jpg
- SCHY34-raw data/figure 10/NOS1.jpg
- SCHY34-raw data/figure 10/SYN.jpg
- SCHY34-raw data/figure 10/beta-actin.jpg
- SCHY34-raw data/figure 10/c-FOS.jpg
- SCHY34-raw data/figure 10/c-jun.jpg
- SCHY34-raw data/figure 11/
- SCHY34-raw data/figure 11/GSH.jpg
- SCHY34-raw data/figure 11/HO_1.jpg
- SCHY34-raw data/figure 11/Nrf2.jpg
- SCHY34-raw data/figure 11/SOD1.jpg
- SCHY34-raw data/figure 11/SOD2.jpg
- SCHY34-raw data/figure 11/beta-actin.jpg
- SCHY34-raw data/figure 12/
- SCHY34-raw data/figure 12/Bax.jpg
- SCHY34-raw data/figure 12/Bcl-2.jpg
- SCHY34-raw data/figure 12/Caspase-3.jpg
- SCHY34-raw data/figure 12/beta-actin.jpg
- SCHY34-raw data/figure 13.png
