# Supplementary material for: Preventive Effect of Limosilactobacillus fermentum SCHY34 on Lead Acetate-Induced Neurological Damage in SD Rats
Source: Front Nutr. 2022 Apr 27;9:852012. doi: 10.3389/fnut.2022.852012 (PMC9094495; doi:10.3389/fnut.2022.852012)
Supplement: Supplementary file 1 [file Data_Sheet_1.ZIP › SCHY34-raw data/in vitro experiments.xlsx]

## Sheet: artificial gastric juice
0h viable count (CFU/mL)	1:10000	1:100000
	15	5	184524
	20	1	196562
	17	2	174581
					88.9673	average	std
					88.6392	88.7121	0.227719
	1:10000	1:100000			88.5297
3h viable count (CFU/mL)	15	3	164166
	18	4	174231
	13	4	154556

## Sheet: bile salt
OD600 Blank	OD600 0.3%	OD600 0.3%-OD600 blank
2.31485	4.21304	1.89819
2.40958	4.05087	1.64129		85.7749	average	std
2.45842	4.09659	1.63817		85.1835	85.3186	0.406016
				84.9973
	OD600 0.0%	OD600 0.0%-OD600 blank
	4.52784	2.21299
	4.33635	1.92677
	4.38574	1.92732

## Sheet: surface hydrophobicity
A0	A1
0.5379	0.306872	42.9499	average	std
0.5874	0.329082	43.9765	43.775	0.745074
0.5983	0.332663	44.3986

## Sheet: lead adsorption
Ci	Cf
3.7541	1.1253	70.0248	average	std
3.7633	1.1381	69.7579	69.5788	0.557507
3.7019	1.1493	68.9538
