# Supplementary material for: Preventive Effect of Limosilactobacillus fermentum SCHY34 on Lead Acetate-Induced Neurological Damage in SD Rats
Source: Front Nutr. 2022 Apr 27;9:852012. doi: 10.3389/fnut.2022.852012 (PMC9094495; doi:10.3389/fnut.2022.852012)
Supplement: Supplementary file 1 [file Data_Sheet_1.ZIP › SCHY34-raw data/table 2.xlsx]

## Sheet: Sheet1
BEFORE	元素/element	原子百分比/Atomic percentage	元素/element	wt%	wt% Sigma
	C	53.29	C	47.34	1.62
	N	24.93	N	25.83	2.4
	O	21.13	O	25	1.02
	P	0.63	P	1.45	0.12
	Pb	0.02	Pb	0.38	0.21
	总量/total:	100	总量/total:	100
AFTER	元素/element	原子百分比/Atomic percentage	元素/element	wt%	wt% Sigma
	C	55.17	C	47.55	1.71
	N	22.8	N	22.91	2.6
	O	20.9	O	23.99	1.04
	P	0.89	P	1.99	0.13
	Pb	0.24	Pb	3.56	0.32
	总量/total:	100	总量/total:	100
