# Supplementary material for: Preventive Effect of Limosilactobacillus fermentum SCHY34 on Lead Acetate-Induced Neurological Damage in SD Rats
Source: Front Nutr. 2022 Apr 27;9:852012. doi: 10.3389/fnut.2022.852012 (PMC9094495; doi:10.3389/fnut.2022.852012)
Supplement: Supplementary file 1 [file Data_Sheet_1.ZIP › SCHY34-raw data/table 3.xlsx]

## Sheet: Incubation period
		Normal	Lead-induced	EDTA	LF-SCHY34
Incubation period (s)	1	18.54	98.12	81.74	49.01
	2	19.39	104.37	86.86	51.31
	3	21.71	103.49	87.82	51.58
	4	18.01	113.31	80.15	53.81
	5	22.33	111.19	84.42	54.83
	6	19.45	105.77	81.6	55.38
	7	23.41	114.4	87.99	51.95
	8	21.6	111.69	81.2	50.4
	9	19.4	115.73	86.44	52.1
	10	21.15	103.18	84.94	56.63
	11	19.57	112.73	80.94	53.7
	12	21.15	113.97	79.65	48.03
		20.4758	108.996	83.6458	52.3942
		1.64539	5.70607	3.10449	2.57784

## Sheet: Number of shuttles
Number of shuttles		Normal	Lead-induced	EDTA	LF-SCHY34
	1	25.7	11.3	14	16.6
	2	22.6	11.8	14.7	18.9
	3	23.9	9.3	17.1	19.2
	4	22.7	10.5	13.6	18.5
	5	21.9	9.3	16.6	18.9
	6	24.3	11.9	16.2	22.7
	7	23.5	10.2	16.7	17.6
	8	22.1	13.3	17	18.5
	9	22.4	11.4	15.2	17.4
	10	21	6.9	16.2	21
	11	26.1	11.9	15.6	19
	12	24.1	8.8	16.1	18
		23.3583	10.55	15.75	18.8583
		1.53591	1.75006	1.15404	1.63176

## Sheet: Swimming speed
Swimming speed（cm/s）		Normal	Lead-induced	EDTA	LF-SCHY34
	1	20.98	22.96	24.9	23.51
	2	21.94	23.98	22.93	23.34
	3	23.09	22.35	22.96	23.61
	4	23.25	24.77	22.48	23.21
	5	23.96	22.44	23.08	22.76
	6	25.47	22.68	23.47	24.17
	7	24.48	21.28	23.12	24.11
	8	24.06	23.95	23.99	21.51
	9	21.22	22.93	23.7	25.77
	10	22	21.78	24.75	21.12
	11	25.04	23.92	25.75	21.39
	12	25.86	22.69	24.25	23.48
		23.4458	22.9775	23.7817	23.165
		1.64415	1.01013	0.974874	1.32712
