# Supplementary material for: Preventive Effect of Limosilactobacillus fermentum SCHY34 on Lead Acetate-Induced Neurological Damage in SD Rats
Source: Front Nutr. 2022 Apr 27;9:852012. doi: 10.3389/fnut.2022.852012 (PMC9094495; doi:10.3389/fnut.2022.852012)
Supplement: Supplementary file 1 [file Data_Sheet_1.ZIP › SCHY34-raw data/table 4.xlsx]

## Sheet: Conditioned reflex latency
Conditioned reflex latency（s）	1	29.49	90.51	89.77	62.75
	2	54.48	106.75	89.67	75.29
	3	42.39	94.45	74.22	73.16
	4	34.56	96.25	75.85	65.49
	5	28.4673	94.48	72.97	66.71
	6	41.22	92.16	75.29	72.53
	7	31.17	95.72	80.39	61.82
	8	38.29	91.3	79.2	72.13
	9	45.38	93.84	92.19	70.49
	10	31.89	95.8	84.96	76.02
	11	36.4	96.25	82.08	59.48
	12	28.44	107.44	72.72	62.36
		36.8481	96.2458	80.7758	68.1858
		7.93678	5.41302	6.97586	5.76488

## Sheet: Number of conditioned reflexes
		Nomal group	Lead-induced group	EDTA group	LF-SCHY34 group
Number of conditioned reflexes	1	21.3	12.6	14.3	19.1
	2	28	12.8	16	22.5
	3	25.3	12.5	14.9	18.8
	4	23.8	12.3	15.4	19.9
	5	24.7	10.3	14.5	19.2
	6	22	11.8	12.5	17.9
	7	22.5	13.6	16.7	19.6
	8	25	14.2	18.1	22.2
	9	26.2	12.5	14.6	19
	10	24.7	11.3	15.9	18.9
	11	23.3	15.5	15	20.3
	12	23.1	13.5	13.9	23
		24.1583	12.7417	15.15	20.0333
		1.88509	1.35878	1.43242	1.64722
