# Supplementary material for: Preventive Effect of Limosilactobacillus fermentum SCHY34 on Lead Acetate-Induced Neurological Damage in SD Rats
Source: Front Nutr. 2022 Apr 27;9:852012. doi: 10.3389/fnut.2022.852012 (PMC9094495; doi:10.3389/fnut.2022.852012)
Supplement: Supplementary file 1 [file Data_Sheet_1.ZIP › SCHY34-raw data/table 5.xlsx]

## Sheet: Blood
		Normal group	Lead-induced group	EDTA group	LF-SCHY34 group
		0.540096	3.53161	2.58077	2.36811
		0.554172	3.56245	2.62795	2.28742
		0.539137	3.87637	2.51726	2.18819
		0.535893	3.71705	2.48351	2.29019
		0.561446	3.67496	2.57968	2.26032
		0.563715	3.51382	2.4719	2.18764
		0.479513	3.85641	2.52815	2.23626
		0.579934	3.54249	2.51363	2.18214
		0.496293	3.53342	2.50093	2.25371
		0.567053	3.56157	2.51363	2.22206
		0.55852	3.61884	2.45811	2.23484
		0.518554	3.50162	2.55355	2.25049
	Concentration（μg/L）	Normal group	Lead-induced group	EDTA group	LF-SCHY34 group
	1	2.13199	31.5714	22.2143	20.1215
	2	2.27051	31.875	22.6786	19.3274
	3	2.12255	34.9643	21.5893	18.3509
	4	2.09062	33.3964	21.2571	19.3547
	5	2.34209	32.9821	22.2036	19.0607
	6	2.36442	31.3964	21.1429	18.3455
	7	1.53579	34.7679	21.6964	18.8239
	8	2.52403	31.6786	21.5536	18.2913
	9	1.70091	31.5893	21.4286	18.9957
	10	2.39727	31.8664	21.5536	18.6842
	11	2.31329	32.4299	21.0071	18.81
	12	1.91999	31.2763	21.9464	18.964
		2.14279	32.4828	21.6893	18.9275
		0.295561	1.28371	0.490865	0.517991

## Sheet: Liver
		Normal group	Lead-induced group	EDTA group	LF-SCHY34 group
		0.398034	1.66962	1.36901	0.945138
		0.411314	1.62159	1.39768	0.936521
		0.397684	1.66578	1.38316	0.926262
		0.423488	1.64904	1.37772	0.996261
		0.420738	1.65229	1.38497	0.967513
		0.420883	1.6575	1.37772	0.945839
		0.40247	1.63023	1.35884	0.948013
		0.425598	1.67068	1.42308	0.941988
		0.403191	1.67206	1.3563	0.934002
		0.413931	1.59817	1.38679	0.962392
		0.393682	1.68992	1.40457	0.947058
		0.400357	1.62354	1.35522	0.94777
	Concentration（μg/L）	Normal group	Lead-induced group	EDTA group	LF-SCHY34 group
	1	0.733957	13.2476	10.2893	6.118
	2	0.864638	12.7749	10.5714	6.0332
	3	0.730505	13.2098	10.4286	5.93224
	4	0.984446	13.0451	10.375	6.6211
	5	0.957382	13.0771	10.4464	6.3382
	6	0.958806	13.1284	10.375	6.1249
	7	0.777609	12.86	10.1893	6.1463
	8	1.00521	13.258	10.8214	6.087
	9	0.784704	13.2716	10.1643	6.00842
	10	0.890397	12.5445	10.4643	6.2878
	11	0.691125	13.4474	10.6393	6.1369
	12	0.756817	12.7942	10.1536	6.1439
		0.844633	13.0549	10.4098	6.16483
		0.112091	0.26186	0.200995	0.181072

## Sheet: Kidney
		Normal group	Lead-induced group	EDTA group	LF-SCHY34 group
		0.496189	3.00974	2.40367	1.71982
		0.449485	2.42382	2.34524	1.77814
		0.513625	2.66642	2.37573	1.73629
		0.514461	2.71505	2.40839	1.72445
		0.497857	2.62097	2.35482	1.66034
		0.501343	2.64973	2.39387	1.6852
		0.495748	2.71505	2.39532	1.59497
		0.494392	2.6519	2.38262	1.73112
		0.508525	2.41978	2.38843	1.57256
		0.471748	3.07016	2.37391	1.80007
		0.504801	2.59051	2.40512	1.85733
		0.490222	2.87456	2.38371	1.5353
	Concentration（μg/L）	Normal group	Lead-induced group	EDTA group	LF-SCHY34 group
	1	1.6999	26.4357	20.4714	13.7416
	2	1.24028	20.6697	19.8964	14.3156
	3	1.87148	23.0571	20.1964	13.9037
	4	1.87972	23.5357	20.5179	13.7872
	5	1.71631	22.6099	19.9907	13.1563
	6	1.75061	22.8929	20.375	13.401
	7	1.69555	23.5357	20.3893	12.513
	8	1.68221	22.9143	20.2643	13.8529
	9	1.8213	20.6299	20.3214	12.2925
	10	1.45937	27.0304	20.1786	14.5314
	11	1.78465	22.3101	20.4857	15.0949
	12	1.64117	25.1055	20.275	11.9258
		1.68688	23.3939	20.2802	13.543
		0.180249	1.97463	0.192255	0.939875

## Sheet: brain
		Normal group	Lead-induced group	EDTA group	LF-SCHY34 group
		0.364008	1.00315	0.659801	0.570928
		0.366002	1.01341	0.66793	0.577523
		0.368886	1.01199	0.662849	0.572513
		0.372847	0.990657	0.661833	0.575744
		0.365786	1.01347	0.662849	0.579809
		0.367045	1.00681	0.664882	0.571121
		0.369118	1.00793	0.659801	0.579728
		0.370273	1.01603	0.65472	0.5755
		0.369827	1.01043	0.666914	0.573782
		0.383469	1.0052	0.649639	0.568662
		0.354043	1.00722	0.66793	0.576943
		0.37401	1.02773	0.668946	0.577634
	Concentration（μg/L）	Normal group	Lead-induced group	EDTA group	LF-SCHY34 group
	1	0.399098	6.68885	3.31	2.4354
	2	0.418728	6.78989	3.39	2.5003
	3	0.447109	6.77589	3.34	2.451
	4	0.48609	6.56595	3.33	2.4828
	5	0.416599	6.79045	3.34	2.5228
	6	0.428985	6.72494	3.36	2.4373
	7	0.44939	6.7359	3.31	2.522
	8	0.460761	6.81569	3.26	2.4804
	9	0.456364	6.7605	3.38	2.46349
	10	0.590617	6.70908	3.21	2.4131
	11	0.301041	6.72894	3.39	2.4946
	12	0.497536	6.93077	3.4	2.5014
		0.446026	6.7514	3.335	2.47538
		0.0678407	0.0860952	0.0568091	0.0354617
