# Supplementary material for: Preventive Effect of Limosilactobacillus fermentum SCHY34 on Lead Acetate-Induced Neurological Damage in SD Rats
Source: Front Nutr. 2022 Apr 27;9:852012. doi: 10.3389/fnut.2022.852012 (PMC9094495; doi:10.3389/fnut.2022.852012)
Supplement: Supplementary file 1 [file Data_Sheet_1.ZIP › SCHY34-raw data/table 6.xlsx]

## Sheet: T-SOD liver
		Normal group	Lead-induced group	EDTA group	LF-SCHY34 group
OD	1	3.42552	1.34347	1.86892	2.51325
	2	2.82655	1.49342	1.58676	2.79562
	3	2.92445	1.58907	2.16022	2.54862
	4	3.40668	1.26593	1.70489	2.64198
	5	2.86103	1.33578	1.80012	2.65132
	6	3.19788	1.52637	1.64437	2.30885
	7	2.79977	1.13001	1.76245	2.35427
	8	2.85325	1.40792	1.92491	2.68012
	9	3.2156	1.54856	1.98142	2.452
	10	2.93893	1.69169	1.74995	2.63775
	11	2.79879	1.17154	1.99249	2.21848
	12	2.88189	1.24055	1.87136	2.58784
		Normal group	Lead-induced group	EDTA group	LF-SCHY34 group
Liver (U/mgprot)	1	279.03	152.255	184.25	223.482
	2	242.559	161.386	167.069	240.676
	3	248.52	167.21	201.987	225.636
	4	277.882	147.534	174.262	231.32
	5	244.658	151.787	180.06	231.889
	6	265.169	163.392	170.577	211.036
	7	240.928	139.258	177.767	213.802
	8	244.184	156.18	187.659	233.643
	9	266.247	164.743	191.1	219.753
	10	249.402	173.458	177.006	231.063
	11	240.868	141.787	191.774	205.534
	12	245.929	145.989	184.398	228.024
		253.781	155.415	182.326	224.655
		14.2865	10.7552	9.90528	10.3654

## Sheet: T-SOD kidney
		Normal group	Lead-induced group	EDTA group	LF-SCHY34 group
OD	1	3.56077	0.219355	1.86531	2.54686
	2	3.28961	0.491963	2.17825	2.93646
	3	3.62946	0.646412	1.55717	2.91843
	4	2.89157	0.539435	1.94788	2.85937
	5	3.71259	0.504866	2.2388	2.9158
	6	3.32071	0.640652	2.17919	2.57154
	7	3.51318	0.286858	2.13958	2.58063
	8	3.64504	0.593071	2.45599	3.01695
	9	3.63438	0.375463	2.21256	2.48792
	10	3.34307	0.503657	1.96404	2.59728
	11	3.38864	0.602446	2.15649	2.88763
	12	3.27553	0.491444	2.01261	2.93343
		Normal group	Lead-induced group	EDTA group	LF-SCHY34 group
Kidney(U/mgprot)	1	114.36	51.0267	82.2242	95.1422
	2	109.22	56.1937	88.1555	102.527
	3	115.662	59.1211	76.3835	102.185
	4	101.676	57.0934	83.7891	101.065
	5	117.237	56.4382	89.3032	102.135
	6	109.81	59.0119	88.1734	95.61
	7	113.458	52.3061	87.4226	95.7823
	8	115.957	58.1101	93.4198	104.052
	9	115.755	53.9855	88.8058	94.025
	10	110.234	56.4153	84.0955	96.0979
	11	111.097	58.2878	87.7432	101.601
	12	108.953	56.1838	85.0161	102.469
		111.952	56.1811	86.211	99.391
		4.3755	2.56149	4.30594	3.68126

## Sheet: T-SOD brain
		Normal group	Lead-induced group	EDTA group	LF-SCHY34 group
OD	1	4.25585	1.67337	2.5867	3.547
	2	4.31941	1.72861	2.57815	3.36129
	3	4.48438	1.92308	2.53275	3.39956
	4	4.46449	1.87407	2.47538	3.85881
	5	4.41275	1.92102	2.67647	3.33226
	6	4.45161	1.88785	2.70775	3.50993
	7	4.46635	1.6856	2.59575	3.26939
	8	4.22007	1.74565	2.4197	3.26675
	9	4.24722	1.90765	2.80315	3.39802
	10	4.33337	1.77769	2.3891	3.33857
	11	4.55646	1.7185	2.69614	3.32589
	12	4.46059	1.93779	2.71627	3.44985
		Normal group	Lead-induced group	EDTA group	LF-SCHY34 group
brain tissue (U/mgprot)	1	255.897	85.2291	145.588	209.052
	2	260.098	88.8797	145.023	196.778
	3	271	101.731	142.023	199.308
	4	269.685	98.4925	138.232	229.658
	5	266.266	101.596	151.521	194.86
	6	268.835	99.4031	153.588	206.602
	7	269.809	86.037	146.186	190.705
	8	253.533	90.0056	134.552	190.53
	9	255.327	100.712	159.893	199.206
	10	261.021	92.123	132.529	195.277
	11	275.763	88.2113	152.821	194.439
	12	269.428	102.704	154.151	202.631
		264.722	94.5936	146.342	200.754
		7.25953	6.76191	8.43405	10.7552

## Sheet: T-SOD serum
		Normal group	Lead-induced group	EDTA group	LF-SCHY34 group
OD	1	2.75786	0.422906	1.99976	2.45959
	2	2.56901	0.557772	1.94469	2.42234
	3	2.75741	0.345821	1.67474	2.51321
	4	2.63083	0.415848	2.18204	2.50317
	5	2.72489	0.539161	1.58207	2.4547
	6	2.7572	0.320966	1.83903	2.44719
	7	2.99521	0.392463	1.70372	2.50494
	8	2.68762	0.582735	2.05549	2.47407
	9	2.96864	0.530829	1.99857	2.53559
	10	2.75697	0.507129	1.79394	2.39797
	11	2.64656	0.523915	2.01708	2.52496
	12	2.8349	0.514952	2.08374	2.54179
		Normal group	Lead-induced group	EDTA group	LF-SCHY34 group
Serum (U/mlprot)	1	409.527	214.64	346.252	384.631
	2	393.764	225.896	341.655	381.523
	3	409.489	208.206	319.124	389.107
	4	398.925	214.051	361.466	388.269
	5	406.775	224.343	311.39	384.223
	6	409.472	206.131	332.837	383.597
	7	429.337	212.099	321.543	388.417
	8	403.664	227.98	350.904	385.841
	9	427.12	223.648	346.153	390.975
	10	409.452	221.67	329.073	379.489
	11	400.237	223.071	347.698	390.087
	12	415.957	222.322	353.261	391.492
		409.477	218.671	338.446	386.471
		10.5847	7.29279	15.4662	3.84798

## Sheet: CAT liver
		Normal group	Lead-induced group	EDTA group	LF-SCHY34 group
OD	1	1.26461	0.538738	0.792298	1.02772
	2	1.28291	0.528464	0.923292	1.0463
	3	1.28532	0.567147	0.863789	1.04163
	4	1.22684	0.528689	0.868505	1.08669
	5	1.22816	0.553696	0.769263	1.08046
	6	1.2222	0.558261	0.846443	1.07848
	7	1.24645	0.532227	0.9332	0.99048
	8	1.2117	0.549013	0.846972	1.00143
	9	1.243	0.532211	0.821575	1.01736
	10	1.23771	0.55899	0.896516	1.0404
	11	1.23008	0.535413	0.830801	1.01757
	12	1.17331	0.526241	0.769945	1.07001
		Normal group	Lead-induced group	EDTA group	LF-SCHY34 group
Liver (U/mgprot)	1	53.9787	13.6383	27.73	40.8134
	2	54.9956	13.0674	35.0099	41.8462
	3	55.1299	15.2172	31.7031	41.5865
	4	51.8797	13.0799	31.9652	44.0909
	5	51.9529	14.4697	26.4498	43.7446
	6	51.6216	14.7234	30.7391	43.6346
	7	52.9694	13.2765	35.5606	38.7439
	8	51.0383	14.2094	30.7685	39.3525
	9	52.778	13.2756	29.357	40.2379
	10	52.4838	14.7639	33.5219	41.518
	11	52.0595	13.4536	29.8698	40.2496
	12	48.9046	12.9438	26.4877	43.1638
		52.4827	13.8432	30.7635	41.5818
		1.7146	0.790125	3.01285	1.78271

## Sheet: CAT kidney
		Normal group	Lead-induced group	EDTA group	LF-SCHY34 group
OD	1	1.90971	0.624261	0.999478	1.39748
	2	1.83201	0.598029	0.790879	1.33528
	3	1.93813	0.619504	0.738234	1.39716
	4	1.912	0.622041	0.871885	1.38057
	5	1.84471	0.628251	0.765763	1.40087
	6	1.76538	0.671313	0.883919	1.32972
	7	1.9084	0.694546	0.869415	1.41452
	8	1.71285	0.625083	1.00907	1.4377
	9	1.90968	0.568322	0.855402	1.40405
	10	1.793	0.604512	0.840895	1.40338
	11	1.94634	0.585213	0.799959	1.25032
	12	1.90493	0.644518	0.840147	1.33102
		Normal group	Lead-induced group	EDTA group	LF-SCHY34 group
Kidney (U/mgprot)	1	13.1743	2.18894	5.39554	8.79685
	2	12.5104	1.96476	3.61285	8.26532
	3	13.4172	2.14828	3.16295	8.79411
	4	13.194	2.16996	4.30513	8.65234
	5	12.6189	2.22304	3.39821	8.82581
	6	11.941	2.59105	4.40797	8.21777
	7	13.1632	2.78959	4.28402	8.94248
	8	11.492	2.19596	5.4775	9.14057
	9	13.1741	1.71088	4.16427	8.85298
	10	12.177	2.02016	4.04029	8.84727
	11	13.4874	1.85523	3.69045	7.53922
	12	13.1336	2.36205	4.0339	8.22891
		12.7903	2.18499	4.16442	8.59197
		0.638492	0.297584	0.706115	0.445698

## Sheet: CAT brain
		Normal group	Lead-induced group	EDTA group	LF-SCHY34 group
OD	1	2.83708	0.781583	1.64236	2.30568
	2	2.92843	0.874083	1.59528	2.1697
	3	2.80351	0.718288	1.46473	1.97491
	4	2.42398	0.80586	1.67339	1.97958
	5	2.93791	0.828221	1.48094	2.02238
	6	2.9017	0.843693	1.41271	2.25336
	7	2.92826	0.720293	1.35201	2.25715
	8	2.7127	0.722108	1.58401	1.87488
	9	2.81339	0.789347	1.36521	2.03648
	10	2.73664	0.823497	1.64273	1.97945
	11	2.90896	0.775557	1.48269	1.96203
	12	2.87293	0.591585	1.66958	2.21809
		Normal group	Lead-induced group	EDTA group	LF-SCHY34 group
brain tissue (U/mgprot)	1	46.1623	18.2713	29.9512	38.9518
	2	47.4019	19.5264	29.3123	37.1066
	3	45.7069	17.4124	27.5409	34.4636
	4	40.557	18.6007	30.3722	34.5269
	5	47.5305	18.9041	27.7609	35.1077
	6	47.0391	19.1141	26.835	38.2418
	7	47.3996	17.4397	26.0115	38.2932
	8	44.4747	17.4643	29.1594	33.1063
	9	45.8409	18.3767	26.1906	35.299
	10	44.7995	18.84	29.9563	34.5252
	11	47.1377	18.1895	27.7846	34.2888
	12	46.6487	15.6932	30.3205	37.7633
		45.8916	18.1527	28.433	35.9728
		1.9645	1.03107	1.60576	1.96833

## Sheet: CAT serum
		Normal group	Lead-induced group	EDTA group	LF-SCHY34 group
OD	1	4.91986	2.55894	3.86811	4.02379
	2	5.04886	2.35261	3.7459	4.68434
	3	4.97513	2.57093	3.63086	4.38611
	4	5.06052	2.39099	3.52085	4.36394
	5	4.87726	2.62906	3.89022	4.16235
	6	5.17843	2.11941	4.0078	4.33521
	7	5.06991	2.39568	3.82657	4.28419
	8	4.86037	2.39784	3.41487	4.46751
	9	4.94789	2.62989	3.72401	4.54008
	10	4.74941	2.40019	3.64042	4.3348
	11	5.21972	2.5479	3.69413	4.30087
	12	5.23551	2.63898	3.72405	4.13092
		Normal group	Lead-induced group	EDTA group	LF-SCHY34 group
Serum (U/mlprot)	1	36.9305	14.3483	26.8704	28.3595
	2	38.1643	12.3747	25.7015	34.6777
	3	37.4591	14.4629	24.6012	31.8252
	4	38.2759	12.7418	23.549	31.6131
	5	36.523	15.0189	27.082	29.6849
	6	39.4036	10.1441	28.2066	31.3383
	7	38.3657	12.7867	26.4731	30.8503
	8	36.3614	12.8074	22.5352	32.6038
	9	37.1986	15.0269	25.4922	33.2979
	10	35.3001	12.8298	24.6926	31.3344
	11	39.7986	14.2426	25.2063	31.0098
	12	39.9496	15.1138	25.4925	29.3843
		37.8109	13.4915	25.4919	31.3316
		1.44751	1.47652	1.56193	1.72353

## Sheet: GSH liver
		Normal group	Lead-induced group	EDTA group	LF-SCHY34 group
OD	1	3.07358	0.867894	1.45798	2.26362
	2	2.77038	0.593158	1.5716	1.85239
	3	2.64697	0.898736	1.59447	2.07638
	4	2.70865	0.625819	1.46211	2.10461
	5	2.64009	0.850831	1.82351	2.09833
	6	2.64915	0.608628	1.45957	2.45284
	7	2.77032	0.677935	1.89795	2.18837
	8	2.75414	0.611627	1.43295	2.21129
	9	2.71807	0.802512	1.31144	2.02523
	10	2.96864	0.773864	1.34784	2.10039
	11	2.90517	0.637877	1.67899	2.27686
	12	2.63858	0.796734	1.44106	2.06116
		Normal group	Lead-induced group	EDTA group	LF-SCHY34 group
Liver (umol/g)	1	448.007	221.121	281.82	364.691
	2	416.819	192.861	293.507	322.391
	3	404.124	224.294	295.859	345.431
	4	410.468	196.22	282.244	348.334
	5	403.416	219.366	319.42	347.689
	6	404.348	194.452	281.983	384.155
	7	416.813	201.581	327.076	356.95
	8	415.148	194.76	279.245	359.309
	9	411.437	214.396	266.746	340.169
	10	437.212	211.449	270.49	347.901
	11	430.684	197.461	304.554	366.053
	12	403.261	213.801	280.079	343.865
		416.811	206.813	290.252	352.245
		14.5634	11.7375	18.6465	15.5053

## Sheet: GSH kidney
		Normal group	Lead-induced group	EDTA group	LF-SCHY34 group
OD	1	2.3977	0.276485	1.44308	1.54277
	2	2.5316	0.777928	1.44841	1.71084
	3	2.33846	0.708014	1.42828	2.07458
	4	2.7747	0.626246	1.31363	1.85802
	5	2.42982	0.326263	1.48828	2.00416
	6	2.37537	0.603401	1.23493	2.04167
	7	2.17282	0.680882	1.49825	1.73859
	8	2.6321	0.80426	1.38954	1.84016
	9	2.55967	0.6777	1.47755	2.03611
	10	2.37691	0.625294	1.24508	1.79697
	11	2.24702	0.626344	1.08114	1.75216
	12	2.62856	0.782287	1.1404	1.89951
		Normal group	Lead-induced group	EDTA group	LF-SCHY34 group
Kidney (umol/g)	1	286.013	85.5941	195.818	205.237
	2	298.665	132.972	196.321	221.116
	3	280.416	126.366	194.419	255.483
	4	321.633	118.641	183.587	235.022
	5	289.048	90.2973	200.088	248.83
	6	283.903	116.482	176.151	252.374
	7	264.765	123.803	201.03	223.738
	8	308.16	135.46	190.759	233.335
	9	301.317	123.502	199.074	251.849
	10	284.049	118.551	177.11	229.254
	11	271.776	118.65	161.621	225.021
	12	307.825	133.384	167.22	238.942
		291.464	118.642	186.933	235.017
		16.4476	15.7125	13.5184	15.2343

[truncated: 10 more sheets: GSH brain, GSH serum, MDA liver, MDA kidney, MDA brain, MDA serum, ROS liver, ROS kidney, ROS brain, ROS serum]
