# Supplementary material for: Preventive Effect of Limosilactobacillus fermentum SCHY34 on Lead Acetate-Induced Neurological Damage in SD Rats
Source: Front Nutr. 2022 Apr 27;9:852012. doi: 10.3389/fnut.2022.852012 (PMC9094495; doi:10.3389/fnut.2022.852012)
Supplement: Supplementary file 1 [file Data_Sheet_1.ZIP › SCHY34-raw data/table 7.xlsx]

## Sheet: ALT 
	OD	Normal group	Lead-induced group	EDTA group	LF-SCHY34 group
	1	0.43928	1.60244	1.27772	0.86437
	2	0.496252	1.74345	1.33284	0.886384
	3	0.521292	1.71984	1.37529	0.940171
	4	0.422099	1.6633	1.17655	0.853914
	5	0.473107	1.58218	1.22594	0.864299
	6	0.328177	1.76958	1.44971	0.877937
	7	0.323641	1.60625	1.11408	0.751495
	8	0.244132	1.77508	1.1081	0.792032
	9	0.482894	1.60042	1.24057	0.900502
	10	0.546574	1.86314	1.12162	0.857729
	11	0.563823	1.72795	1.18244	0.999115
	12	0.441602	1.81624	1.14327	0.908145
	Concentration（μmol/L）	Normal group	Lead-induced group	EDTA group	LF-SCHY34 group
	1	31.0398	61.1192	52.7219	42.0326
	2	32.5131	64.7655	54.1472	42.6019
	3	33.1606	64.1552	55.245	43.9928
	4	30.5955	62.6928	50.1057	41.7622
	5	31.9145	60.595	51.3829	42.0308
	6	28.1667	65.4415	57.1694	42.3835
	7	28.0494	61.2176	48.4902	39.1137
	8	25.9932	65.5835	48.3355	40.1619
	9	32.1676	61.067	51.761	42.967
	10	33.8144	67.8609	48.685	41.8609
	11	34.2605	64.3649	50.258	45.5171
	12	31.0998	66.6479	49.2451	43.1646
		31.0646	63.7926	51.4622	42.2991
		2.51605	2.42479	2.86517	1.64748

## Sheet: AST
	OD	Normal group	Lead-induced group	EDTA group	LF-SCHY34 group
	1	0.409058	2.74252	1.5576	1.5576
	2	0.81905	2.19338	1.85063	1.53895
	3	0.304562	2.81692	1.90765	1.21412
	4	0.19156	2.64729	1.83727	1.23876
	5	0.391176	2.69447	1.59624	1.60289
	6	0.6324	2.48865	1.97492	0.963723
	7	0.553789	2.79103	2.04878	1.09513
	8	0.647244	2.54532	1.87955	1.27464
	9	0.777727	2.3285	2.01889	1.33306
	10	0.773401	2.68422	1.60302	1.54809
	11	0.49566	2.81482	2.06903	1.41595
	12	0.389614	2.85338	1.88158	1.3175
	Concentration（μmol/L）	Normal group	Lead-induced group	EDTA group	LF-SCHY34 group
	1	56.8186	88.9271	72.6226	72.6226
	2	62.4601	81.3709	76.6547	72.3659
	3	55.3808	89.9508	77.4393	67.8963
	4	53.8259	87.6167	76.4708	68.2354
	5	56.5726	88.266	73.1542	73.2458
	6	59.8918	85.4338	78.3649	64.4508
	7	58.8101	89.5946	79.3812	66.259
	8	60.0961	86.2137	77.0526	68.7291
	9	61.8915	83.2301	78.9699	69.533
	10	61.832	88.1248	73.2475	72.4918
	11	58.0103	89.9219	79.6599	70.6735
	12	56.5511	90.4525	77.0806	69.3189
		58.5117	87.4252	76.6748	69.6518
		2.78018	2.85496	2.44678	2.7443

## Sheet: BUN
	OD	Normal group	Lead-induced group	EDTA group	LF-SCHY34 group
	1	0.985845	5.26791	3.87736	2.54725
	2	1.15191	4.82295	3.864	2.17399
	3	0.790752	4.84939	3.6945	2.39349
	4	0.653976	4.48577	3.51126	2.63087
	5	0.836275	4.65177	3.74161	1.95036
	6	1.14401	5.01412	3.6741	2.09556
	7	0.95456	4.90175	3.62888	2.33146
	8	1.32469	4.83946	3.42765	2.47472
	9	1.00111	4.36244	3.40171	2.312
	10	1.30717	4.68374	3.58214	2.31152
	11	0.466022	4.47612	3.93034	2.52023
	12	0.943664	4.54855	3.36334	2.32091
	Concentration（μmol/L）	Normal group	Lead-induced group	EDTA group	LF-SCHY34 group
	1	1349.18	2171.94	1904.76	1649.19
	2	1381.09	2086.44	1902.19	1577.47
	3	1311.7	2091.52	1869.62	1619.65
	4	1285.42	2021.66	1834.41	1665.25
	5	1320.44	2053.55	1878.67	1534.5
	6	1379.57	2123.17	1865.7	1562.4
	7	1343.17	2101.58	1857.01	1607.73
	8	1414.29	2089.61	1818.35	1635.25
	9	1352.11	1997.96	1813.36	1603.99
	10	1410.92	2059.69	1848.03	1603.89
	11	1249.3	2019.8	1914.94	1644
	12	1341.08	2033.72	1805.99	1605.7
		1344.85	2070.89	1859.42	1609.09
		48.7581	49.6031	36.8091	37.642

## Sheet: CRE
	OD	Normal group	Lead-induced group	EDTA group	LF-SCHY34 group
	1	1.49548	3.34705	2.25754	1.93302
	2	1.86968	3.36138	2.06579	2.05219
	3	1.54065	3.3442	2.26441	1.9432
	4	1.78581	3.09216	1.84233	1.46887
	5	1.73032	3.45526	2.11373	1.7395
	6	1.48258	3.19767	2.13828	1.5801
	7	1.6929	3.17939	2.06509	1.92773
	8	1.71871	3.188	2.57416	1.91754
	9	1.7071	3.44928	2.45511	1.72708
	10	1.34581	3.12822	2.66249	1.90963
	11	1.5071	2.97403	2.29285	1.96524
	12	1.50194	3.24256	2.40507	1.76446
	Concentration（μmol/L）	Normal group	Lead-induced group	EDTA group	LF-SCHY34 group
	1	28.55	42.8996	34.4559	31.9409
	2	31.45	43.0107	32.9699	32.8645
	3	28.9	42.8776	34.5092	32.0198
	4	30.8	40.9243	31.238	28.3438
	5	30.37	43.7382	33.3414	30.4411
	6	28.45	41.742	33.5317	29.2058
	7	30.08	41.6003	32.9644	31.8999
	8	30.28	41.667	36.9097	31.8209
	9	30.19	43.6919	35.9871	30.3449
	10	27.39	41.2037	37.5943	31.7596
	11	28.64	40.0087	34.7296	32.1906
	12	28.6	42.0898	35.5993	30.6345
		29.475	42.1211	34.4859	31.1222
		1.20716	1.14457	1.82092	1.34337

## Sheet: δ-ALAD
	OD	Normal group	Lead-induced group	EDTA group	LF-SCHY34 group
	1	3.67165	1.13269	1.77886	2.76018
	2	3.40039	1.46717	1.96704	2.79804
	3	3.85829	1.61398	1.94588	3.04259
	4	4.21989	1.64638	1.45555	2.48829
	5	3.91193	1.24336	1.82406	2.49527
	6	3.71048	1.68251	1.94386	2.79863
	7	3.55419	1.15344	2.42798	2.08727
	8	4.04129	1.12834	1.61863	2.45695
	9	3.43582	1.53331	1.94431	2.49466
	10	3.59864	0.99573	1.96484	2.734
	11	3.57434	1.26105	1.86912	2.78113
	12	3.40178	1.11237	2.40108	2.62115
	Concentration（μmol/L）	Normal group	Lead-induced group	EDTA group	LF-SCHY34 group
	1	503.32	338.618	380.535	444.193
	2	485.723	360.315	392.742	446.649
	3	515.427	369.839	391.369	462.513
	4	538.885	371.941	359.561	426.555
	5	518.907	345.797	383.467	427.008
	6	505.839	374.284	391.238	446.687
	7	495.7	339.964	422.643	400.541
	8	527.298	338.335	370.14	424.522
	9	488.022	364.606	391.267	426.968
	10	498.584	329.733	392.599	442.494
	11	497.007	346.945	386.39	445.552
	12	485.813	337.3	420.898	435.174
		505.044	351.473	390.237	435.738
		16.9773	15.7359	17.8506	15.8734
