# Supplementary material for: Preventive Effect of Limosilactobacillus fermentum SCHY34 on Lead Acetate-Induced Neurological Damage in SD Rats
Source: Front Nutr. 2022 Apr 27;9:852012. doi: 10.3389/fnut.2022.852012 (PMC9094495; doi:10.3389/fnut.2022.852012)
Supplement: Supplementary file 1 [file Data_Sheet_1.ZIP › SCHY34-raw data/table 8.xlsx]

## Sheet: Glu
OD		Normal group	Lead-induced group	EDTA group	LF-SCHY34 group
	1	0.601473	4.25914	2.46451	1.26242
	2	0.585682	4.3015	2.4351	1.27668
	3	0.58986	4.33372	2.37077	1.2246
	4	0.664027	4.29388	2.40326	1.31232
	5	0.598641	4.23991	2.45827	1.25909
	6	0.586819	4.29166	2.37401	1.2554
	7	0.596067	4.33108	2.43195	1.24772
	8	0.569191	4.14584	2.34234	1.26132
	9	0.570449	4.27323	2.40127	1.23267
	10	0.587644	4.25193	2.39733	1.21724
	11	0.596997	4.42917	2.36909	1.33946
	12	0.599443	4.34876	2.34229	1.27659
		Normal group	Lead-induced group	EDTA group	LF-SCHY34 group
Glu	1	49.5219	138.623	94.9054	65.6226
(μmol/gprot)	2	49.1372	139.655	94.189	65.9699
	3	49.239	140.439	92.6219	64.7012
	4	51.0457	139.469	93.4133	66.838
	5	49.4529	138.154	94.7533	65.5414
	6	49.1649	139.415	92.701	65.4517
	7	49.3902	140.375	94.1123	65.2644
	8	48.7355	135.863	91.9295	65.5957
	9	48.7661	138.966	93.3649	64.8977
	10	49.185	138.447	93.269	64.5219
	11	49.4128	142.764	92.581	67.4993
	12	49.4724	140.806	91.9281	65.9677
		49.377	139.415	93.3141	65.656
		0.585039	1.68309	1.01136	0.851553

## Sheet: Gln
OD		Normal group	Lead-induced group	EDTA group	LF-SCHY34 group
	1	4.56427	1.48472	2.69026	3.74431
	2	4.90331	1.46034	2.75895	3.79326
	3	4.77589	1.53583	2.71477	3.86017
	4	4.90068	1.51904	2.88987	3.41676
	5	4.81164	1.40056	2.85288	3.67923
	6	4.6476	1.3654	2.82156	3.75126
	7	4.6183	1.52788	2.79285	3.69499
	8	4.71922	1.32137	2.74335	3.78086
	9	4.95335	1.4216	2.90756	3.82801
	10	4.87376	1.33026	2.56459	3.68061
	11	4.74081	1.49953	2.67143	3.73566
	12	4.54905	1.42702	2.58936	3.69353
		Normal group	Lead-induced group	EDTA group	LF-SCHY34 group
Gln	1	318.535	107.739	190.258	262.408
(μmol/gprot)	2	341.742	106.07	194.96	265.759
	3	333.02	111.238	191.936	270.339
	4	341.561	110.088	203.922	239.987
	5	335.467	101.978	201.39	257.953
	6	324.238	99.5716	199.246	262.884
	7	322.233	110.693	197.281	259.032
	8	329.14	96.5581	193.892	264.91
	9	345.167	103.419	205.132	268.137
	10	339.719	97.1666	181.656	258.048
	11	330.619	108.753	188.97	261.816
	12	317.493	103.79	183.352	258.932
		331.578	104.755	194.333	260.85
		9.4758	5.17355	7.5329	7.68531

## Sheet: GS
OD		Normal group	Lead-induced group	EDTA group	LF-SCHY34 group
	1	4.92225	1.17499	1.76379	3.0558
	2	4.54491	1.38228	1.90881	2.65912
	3	4.33241	1.5878	1.9339	2.84492
	4	4.08067	1.24245	1.64056	3.04967
	5	4.38157	1.39865	1.82678	2.61104
	6	3.85287	1.37725	1.66264	2.79301
	7	3.88177	1.26111	1.85389	2.99701
	8	4.25505	1.38322	1.68467	2.80976
	9	4.41435	1.54042	1.68574	3.08199
	10	4.5469	1.17733	1.95888	2.9381
	11	4.13243	1.26023	1.66376	2.74564
	12	4.10007	1.2323	1.94646	2.77847
		Normal group	Lead-induced group	EDTA group	LF-SCHY34 group
GS	1	116.235	43.6878	55.0869	80.1003
(U/gprot)	2	108.929	47.7009	57.8946	72.4206
	3	104.815	51.6797	58.3802	76.0176
	4	99.9418	44.9938	52.7012	79.9816
	5	105.767	48.0178	56.3064	71.4897
	6	95.5316	47.6036	53.1288	75.0126
	7	96.0911	45.355	56.8313	78.9621
	8	103.318	47.7191	53.5552	75.3369
	9	106.402	50.7625	53.5759	80.6073
	10	108.968	43.7331	58.864	77.8217
	11	100.944	45.338	53.1504	74.0956
	12	100.317	44.7972	58.6235	74.7312
		103.938	46.7824	55.6749	76.3814
		5.89518	2.59169	2.40812	3.07549

## Sheet: MAO
OD		Normal group	Lead-induced group	EDTA group	LF-SCHY34 group
	1	1.11282	5.31384	3.61467	2.23695
	2	1.42892	5.42674	3.71812	2.23679
	3	1.47008	5.21328	3.64923	2.31797
	4	1.35173	5.60638	3.61381	2.11939
	5	1.11832	5.14168	3.55802	2.14551
	6	1.38272	5.21687	3.52184	2.28509
	7	1.13556	5.36795	3.64682	2.21171
	8	1.01502	5.29653	3.71603	2.05926
	9	1.06373	5.47458	3.66487	2.17648
	10	0.897559	5.31365	3.53859	2.19877
	11	1.34506	5.23821	3.65562	1.91009
	12	1.20157	5.34147	3.40513	2.63683
		Normal group	Lead-induced group	EDTA group	LF-SCHY34 group
MAO	1	34.4589	193.047	128.904	76.8947
(U/gprot)	2	46.3916	197.309	132.809	76.8888
	3	47.9455	189.251	130.208	79.9534
	4	43.4777	204.091	128.871	72.4568
	5	34.6664	186.548	126.765	73.4432
	6	44.6476	189.387	125.399	78.7122
	7	35.3174	195.09	130.117	75.9421
	8	30.7671	192.394	132.73	70.1869
	9	32.6058	199.115	130.799	74.6123
	10	26.3329	193.04	126.032	75.4535
	11	43.2259	190.193	130.449	64.5559
	12	37.8091	194.09	120.994	91.9902
		38.1372	193.63	128.673	75.9242
		6.86911	4.83134	3.38557	6.51064

## Sheet: AchE
OD		Normal group	Lead-induced group	EDTA group	LF-SCHY34 group
	1	2.74778	1.18919	1.70405	2.55869
	2	2.97274	1.17831	1.58824	2.55782
	3	2.94399	1.18947	1.71266	2.48194
	4	2.94323	1.25334	1.69921	2.20607
	5	2.94687	1.25966	1.74642	2.37494
	6	2.96318	1.19497	1.73395	2.36462
	7	2.88904	1.1778	1.609	2.47794
	8	2.97388	1.19698	1.71055	2.40376
	9	2.93587	1.17474	1.63764	2.40855
	10	3.04832	1.2238	1.63374	2.46456
	11	2.99316	1.21073	1.59849	2.42387
	12	2.93855	1.21624	1.64772	2.46503
		Normal group	Lead-induced group	EDTA group	LF-SCHY34 group
AchE	1	133.426	54.9196	80.8532	123.901
(U/gprot)	2	144.757	54.3717	75.0198	123.857
	3	143.309	54.9334	81.2865	120.035
	4	143.271	58.151	80.609	106.14
	5	143.454	58.4693	82.9874	114.646
	6	144.276	55.2107	82.3593	114.126
	7	140.541	54.3457	76.0655	119.834
	8	144.814	55.3121	81.1806	116.097
	9	142.9	54.1918	77.5079	116.339
	10	148.564	56.6627	77.3113	119.16
	11	145.785	56.0043	75.5358	117.11
	12	143.035	56.282	78.0158	119.184
		143.178	55.7379	79.061	117.536
		3.62369	1.42946	2.79036	4.77583

## Sheet: NE
OD		Normal group	Lead-induced group	EDTA group	LF-SCHY34 group
	1	3.89081	1.67219	2.38419	3.24456
	2	4.01253	1.70494	2.40693	3.25268
	3	3.9352	1.58997	2.35427	3.29133
	4	3.88403	1.61514	2.43876	3.13248
	5	4.0555	1.65412	2.35351	3.07944
	6	3.60493	1.74822	2.29717	3.08095
	7	3.80271	1.66198	2.41028	3.05803
	8	3.85724	1.62509	2.30178	3.12157
	9	3.9545	1.72483	2.50638	3.21234
	10	4.1048	1.49819	2.38769	3.0683
	11	3.76314	1.90551	2.23057	2.91603
	12	3.87248	1.69661	2.63735	2.69435
		Normal group	Lead-induced group	EDTA group	LF-SCHY34 group
NE	1	376.571	190.25	250.045	322.298
(pg/mL)	2	386.792	193.001	251.954	322.98
	3	380.298	183.345	247.531	326.225
	4	376.001	185.459	254.627	312.886
	5	390.401	188.733	247.468	308.431
	6	352.562	196.636	242.737	308.558
	7	369.172	189.393	252.235	306.633
	8	373.751	186.295	243.123	311.969
	9	381.919	194.671	260.306	319.593
	10	394.541	175.638	250.338	307.496
	11	365.848	209.844	237.143	294.708
	12	375.031	192.301	271.305	276.091
		376.907	190.464	250.734	309.822
		11.3481	8.30282	8.85151	13.7926

## Sheet: cAMP
OD		Normal group	Lead-induced group	EDTA group	LF-SCHY34 group
	1	3.87065	2.16146	2.59175	3.24949
	2	3.82599	2.20987	2.40193	3.35834
	3	3.90718	2.18176	2.45864	3.21701
	4	3.65105	2.22642	2.49833	3.19103
	5	3.92342	2.21018	2.6013	3.19915
	6	4.00783	2.30761	2.38475	3.22513
	7	3.92424	2.1777	2.40505	3.18981
	8	3.86659	2.18582	2.41317	3.05462
	9	3.87471	2.11924	2.5512	3.17642
	10	3.78539	2.14692	2.49436	3.24137
	11	3.93154	2.17486	2.24774	3.10504
	12	4.06998	2.27216	2.51872	3.19265
		Normal group	Lead-induced group	EDTA group	LF-SCHY34 group
cAMP	1	237.105	126.316	154.207	196.842
(μmol/gprot)	2	234.211	129.454	141.903	203.897
	3	239.474	127.632	145.579	194.737
	4	222.871	130.526	148.152	193.053
	5	240.526	129.474	154.826	193.579
	6	245.998	135.789	140.789	195.263
	7	240.579	127.368	142.105	192.974
	8	236.842	127.895	142.632	184.211
	9	237.368	123.579	151.579	192.105
	10	231.579	125.373	147.895	196.316
	11	241.053	127.184	131.908	187.478
	12	250.026	133.492	149.474	193.158
		238.136	128.673	145.921	193.634
		6.87495	3.39185	6.50733	4.83101

## Sheet: AC
OD		Normal group	Lead-induced group	EDTA group	LF-SCHY34 group
	1	5.34991	1.97379	3.35138	4.38238
	2	5.49321	1.79955	3.22939	4.40721
	3	5.89305	1.92125	3.35951	4.48437
	4	5.69256	1.95896	3.52964	4.6228
	5	5.67059	1.95822	3.29529	4.47659
	6	5.7904	1.98992	3.34382	4.42811
	7	5.57335	1.98743	3.25545	4.50313
	8	5.77491	1.96972	3.33175	4.40439
	9	5.69578	1.95046	3.27108	4.40578
	10	5.42249	1.99761	3.35346	4.30805
	11	5.54359	1.97986	3.31333	4.3773
	12	5.63362	1.98261	3.32244	4.13418
		Normal group	Lead-induced group	EDTA group	LF-SCHY34 group
AC	1	73.5562	23.4208	43.878	59.1883
(U/gprot)	2	75.6842	20.8333	42.0665	59.557
	3	81.6218	22.6406	43.9987	60.7029
	4	78.6446	23.2005	46.5252	62.7586
	5	78.3183	23.1895	43.0451	60.5874
	6	80.0974	23.6604	43.7657	59.8674
	7	76.8743	23.6233	42.4534	60.9814
	8	79.8674	23.3604	43.5865	59.5151
	9	78.6923	23.0743	42.6855	59.5358
	10	74.634	23.7745	43.9089	58.0846
	11	76.4324	23.5109	43.313	59.1129
	12	77.7692	23.5517	43.4483	55.5025
		77.6827	23.1534	43.5562	59.6162
		2.35507	0.793164	1.12044	1.74905
