# Supplementary material for: Preventive Effect of Limosilactobacillus fermentum SCHY34 on Lead Acetate-Induced Neurological Damage in SD Rats
Source: Front Nutr. 2022 Apr 27;9:852012. doi: 10.3389/fnut.2022.852012 (PMC9094495; doi:10.3389/fnut.2022.852012)
Supplement: Supplementary file 1 [file Data_Sheet_1.ZIP › SCHY34-raw data/table 9.xlsx]

## Sheet: BDNF
	GAPDH Ct	Ct	△Ct	△△Ct	2-△△Ct	average	std
Normal	19.157	21.5754	2.41841	-3.26754	9.63
	19.3358	21.8963	2.56046	-3.12549	8.727	9.145	0.455213
	19.1925	21.696	2.50357	-3.18237	9.078
Lead-induced	20.2756	26.0253	5.74976		1
	20.1449	25.5615	5.41656	5.68595	1	1	0
	20.0731	25.9646	5.89152		1
EDTA	19.6982	23.6881	3.98995	-1.69599	3.24
	19.7862	23.3956	3.60939	-2.07656	4.218	3.655	0.505519
	19.7804	23.6561	3.87571	-1.81024	3.507
LF-SCHY34	18.5205	21.6881	3.16766	-2.51828	5.729
	18.4842	21.5367	3.05251	-2.63343	6.205	6.03467	0.265293
	18.4937	21.5544	3.06068	-2.62527	6.17

## Sheet: c-fos
	GAPDH Ct	Ct	△Ct	△△Ct	2-△△Ct	average	std
Normal	19.157	23.0884	3.9314	-2.97856	7.882
	19.3358	23.3301	3.99424	-2.91571	7.546	7.68533	0.175184
	19.1925	23.1711	3.97865	-2.9313	7.628
Lead-induced	20.2756	27.4267	7.15114		1
	20.1449	26.9137	6.76876	6.90996	1	1	0
	20.0731	26.883	6.80996		1
EDTA	19.6982	25.4414	5.74324	-1.16672	2.245
	19.7862	25.5938	5.80763	-1.10232	2.147	2.10533	0.164506
	19.7804	25.7463	5.96585	-0.944109	1.924
LF-SCHY34	18.5205	23.0261	4.5056	-2.40436	5.294
	18.4842	23.0835	4.59933	-2.31063	4.961	5.175	0.185718
	18.4937	23.0058	4.51215	-2.3978	5.27

## Sheet: c-jun
	GAPDH Ct	Ct	△Ct	△△Ct	2-△△Ct	average	std
Normal	19.157	20.4241	1.26715	-2.81188	7.022
	19.3358	20.5591	1.22324	-2.85579	7.239	6.90533	0.404811
	19.1925	20.5811	1.38862	-2.69042	6.455
Lead-induced	20.2756	24.262	3.98648		1
	20.1449	24.112	3.96706	4.07904	1	1	0
	20.0731	24.3566	4.28356		1
EDTA	19.6982	22.3993	2.70108	-1.37796	2.599
	19.7862	22.1617	2.37549	-1.70354	3.257	2.96533	0.335294
	19.7804	22.2554	2.47496	-1.60407	3.04
LF-SCHY34	18.5205	20.2959	1.7754	-2.30363	4.937
	18.4842	20.1931	1.70887	-2.37016	5.17	5.17067	0.234001
	18.4937	20.1384	1.64474	-2.43429	5.405

## Sheet: Nrf2
	GAPDH Ct	Ct	△Ct	△△Ct	2-△△Ct	average	std
Normal	19.157	23.5546	4.39762	-0.0635029	1.045
	19.3358	24.5704	5.23462	0.773491	0.585	0.865333	0.245968
	19.1925	23.7035	4.51103	0.0499049	0.966
Lead-induced	20.2756	25.0212	4.74559		1
	20.1449	24.8023	4.65737	4.46113	1	1	0
	20.0731	24.0535	3.98041		1
EDTA	19.6982	21.7841	2.08595	-2.37518	5.188
	19.7862	22.0672	2.28098	-2.18015	4.532	4.755	0.375045
	19.7804	22.0573	2.27685	-2.18428	4.545
LF-SCHY34	18.5205	19.9582	1.43769	-3.02343	8.131
	18.4842	20.246	1.7618	-2.69933	6.495	7.575	0.935444
	18.4937	19.9371	1.44338	-3.01774	8.099

## Sheet: HO-1
	GAPDH Ct	Ct	△Ct	△△Ct	2-△△Ct	average	std
Normal	19.157	24.329	5.17205	0.859876	0.551
	19.3358	23.4264	4.0906	-0.221568	1.166	0.935	0.334833
	19.1925	23.3829	4.19049	-0.121679	1.088
Lead-induced	20.2756	24.4759	4.20036		1
	20.1449	24.7512	4.60628	4.31217	1	1	0
	20.0731	24.2029	4.12987		1
EDTA	19.6982	21.8264	2.12821	-2.18396	4.544
	19.7862	22.2404	2.45419	-1.85798	3.625	3.88533	0.57458
	19.7804	22.2906	2.51019	-1.80199	3.487
LF-SCHY34	18.5205	19.9553	1.43482	-2.87735	7.348
	18.4842	20.0719	1.58774	-2.72443	6.609	6.83467	0.445639
	18.4937	20.095	1.60134	-2.71083	6.547

## Sheet: SOD1
	GAPDH Ct	Ct	△Ct	△△Ct	2-△△Ct	average	std
Normal	19.157	21.9399	2.78295	-3.4034	10.581
	19.3358	22.0558	2.71998	-3.46637	11.053	10.235	1.03531
	19.1925	22.1975	3.00509	-3.18126	9.071
Lead-induced	20.2756	26.8913	6.61571		1
	20.1449	26.5058	6.36089	6.18635	1	1	0
	20.0731	25.6555	5.58244		1
EDTA	19.6982	23.3092	3.61104	-2.57531	5.96
	19.7862	23.4892	3.70298	-2.48336	5.592	5.555	0.42471
	19.7804	23.6126	3.83218	-2.35417	5.113
LF-SCHY34	18.5205	21.6395	3.11905	-3.06729	8.382
	18.4842	21.6027	3.11854	-3.06781	8.385	8.67533	0.505472
	18.4937	21.4692	2.97549	-3.21086	9.259

## Sheet: SOD2
	GAPDH Ct	Ct	△Ct	△△Ct	2-△△Ct	average	std
Normal	19.157	20.2366	1.07964	-3.08695	8.497
	19.3358	20.3718	1.03599	-3.1306	8.758	8.85533	0.415637
	19.1925	20.1401	0.947653	-3.21894	9.311
Lead-induced	20.2756	24.8582	4.58269		1
	20.1449	23.9085	3.76358	4.16659	1	1	0
	20.0731	24.2266	4.1535		1
EDTA	19.6982	22.6942	2.99602	-1.17057	2.251
	19.7862	22.7944	3.00825	-1.15834	2.232	2.435	0.335286
	19.7804	22.4503	2.66987	-1.49672	2.822
LF-SCHY34	18.5205	20.1638	1.64328	-2.52331	5.749
	18.4842	20.0957	1.61151	-2.55508	5.877	5.60533	0.365339
	18.4937	20.2845	1.79085	-2.37573	5.19

## Sheet: Bax
	GAPDH Ct	Ct	△Ct	△△Ct	2-△△Ct	average	std
Normal	19.157	23.2515	4.09452	1.73216	0.301
	19.3358	23.8502	4.51435	2.152	0.225	0.254667	0.0406489
	19.1925	23.6258	4.43332	2.07097	0.238
Lead-induced	20.2756	22.6499	2.37434		1
	20.1449	22.381	2.2361	2.36235	1	1	0
	20.0731	22.5497	2.47662		1
EDTA	19.6982	22.3096	2.61139	0.249038	0.841457
	19.7862	22.5735	2.78734	0.424993	0.744842	0.7761	0.0566189
	19.7804	22.5733	2.79286	0.430509	0.742
LF-SCHY34	18.5205	21.6102	3.08973	0.72738	0.604
	18.4842	21.9084	3.42425	1.0619	0.479	0.565	0.0745855
	18.4937	21.5644	3.07075	0.708396	0.612

## Sheet: Bcl-2
	GAPDH Ct	Ct	△Ct	△△Ct	2-△△Ct	average	std
Normal	19.157	22.1733	3.0163	-2.63483	6.211
	19.3358	22.2505	2.91474	-2.73639	6.664	6.38467	0.244287
	19.1925	22.193	3.00059	-2.65053	6.279
Lead-induced	20.2756	25.9978	5.72224		1
	20.1449	25.7665	5.62163	5.65112	1	1	0
	20.0731	25.6826	5.6095		1
EDTA	19.6982	23.9847	4.28655	-1.36457	2.575
	19.7862	23.936	4.14981	-1.50131	2.831	2.728	0.135126
	19.7804	23.9575	4.17708	-1.47405	2.778
LF-SCHY34	18.5205	21.975	3.45452	-2.19661	4.584
	18.4842	21.8366	3.35247	-2.29866	4.92	4.675	0.214502
	18.4937	21.9682	3.47448	-2.17664	4.521

## Sheet: Caspase-3
	GAPDH Ct	Ct	△Ct	△△Ct	2-△△Ct	average	std
Normal	19.157	28.2482	9.09127	2.88897	0.135
	19.3358	28.2278	8.89196	2.68966	0.155	0.170667	0.0455668
	19.1925	27.5661	8.37367	2.17137	0.222
Lead-induced	20.2756	26.3184	6.04283		1
	20.1449	26.7987	6.65376	6.2023	1	1	0
	20.0731	25.9834	5.91032		1
EDTA	19.6982	26.3174	6.61927	0.416962	0.749
	19.7862	26.5072	6.721	0.518701	0.698	0.713103	0.0312172
	19.7804	26.5132	6.73281	0.530509	0.69231
LF-SCHY34	18.5205	26.6573	8.13687	1.93456	0.2616
	18.4842	26.2821	7.79797	1.59566	0.33087	0.292878	0.0351196
	18.4937	26.5011	8.00739	1.80509	0.286164
